# Supplementary material for: Groundwater quality and depletion in the Indo-Gangetic Basin mapped from in situ observations
Source: Springer Nature journal article supplement (doi:10.1038/ngeo2791), 2016-08-29
Supplement: 41561_2016_BFngeo2791_MOESM589_ESM.pdf [file 41561_2016_BFngeo2791_MOESM589_ESM.pdf]

# Groundwater quality and depletion in the Indo-Gangetic Basin mapped from *in situ* observations

A. M. MacDonald, H. C. Bonsor, K. M. Ahmed, W. G. Burgess, M. Basharat, R. C. Calow, A. Dixit, S. S. D. Foster, K. Gopal, D. J. Lapworth, R. M. Lark, M. Moench, A. Mukherjee, M. S. Rao, M. Shamsudduha, L. Smith, R. G. Taylor, J. Tucker, F. van Steenberg and S. K. Yadav

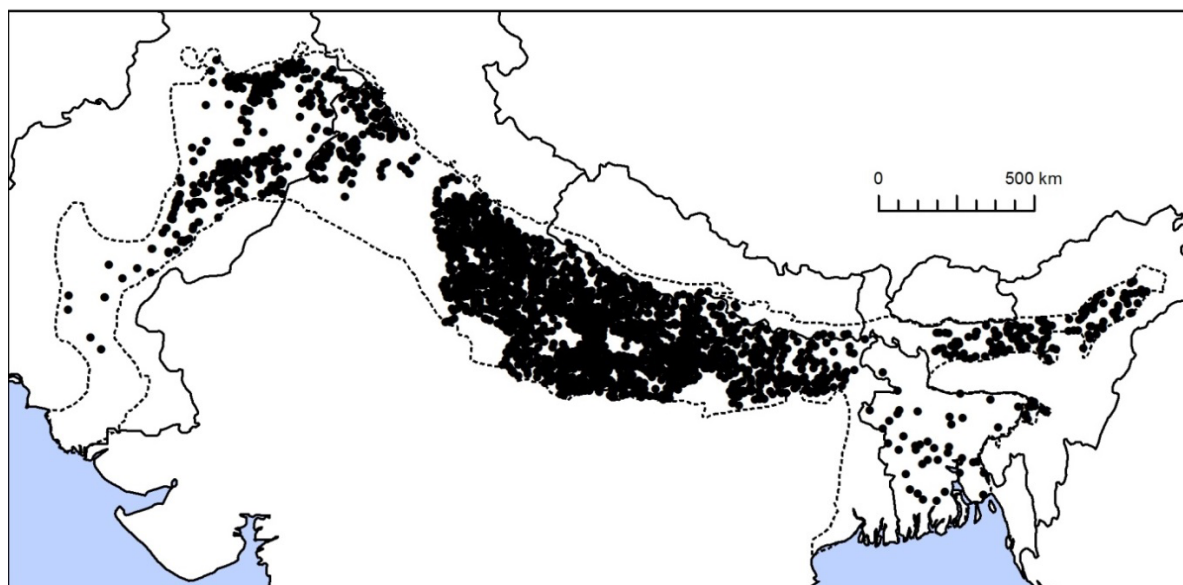

**Supplementary Figure 1** Distribution of the finalised water-table time series record dataset for the IGB aquifer. There are 3429 individual time series, each with 7 years or more data and 2 or more records per year.

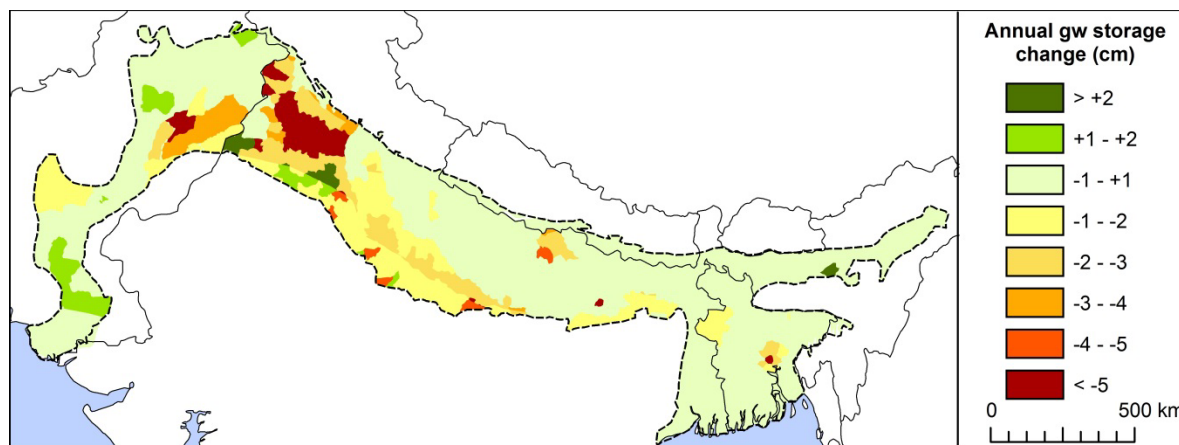

**Supplementary Figure 2** Annual groundwater storage change in cm/yr, calculated using the map of annual groundwater-level change, and specific yield.

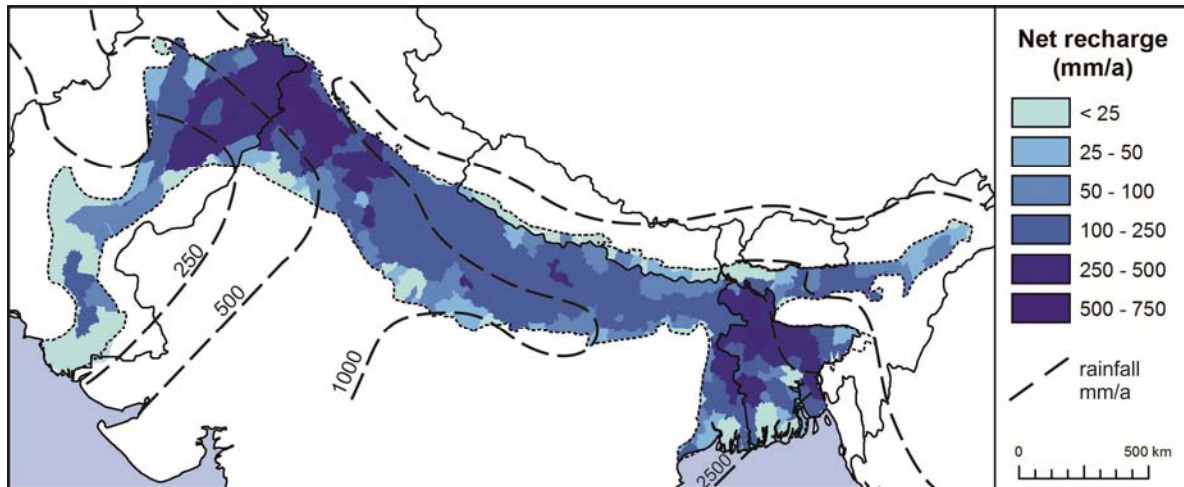

**Supplementary Figure 3** Annual net recharge for the IGB aquifer over the period 2000 - 2012, calculated by subtracting the annual change in groundwater storage from the annual abstraction. The net recharge is therefore the volume of recharge required to balance the abstraction. This may be met from a combination of reduced groundwater discharge and annual direct and indirect recharge. In areas of high rainfall (>1000 mm) the recharge could be dominated by rainfall. In areas of low rainfall, (<500 mm) the recharge will be dominated by irrigation returns and canal leakage. In areas of moderate rainfall (500 – 1000mm) recharge is likely to be met by a combination of canal leakage and rainfall recharge.

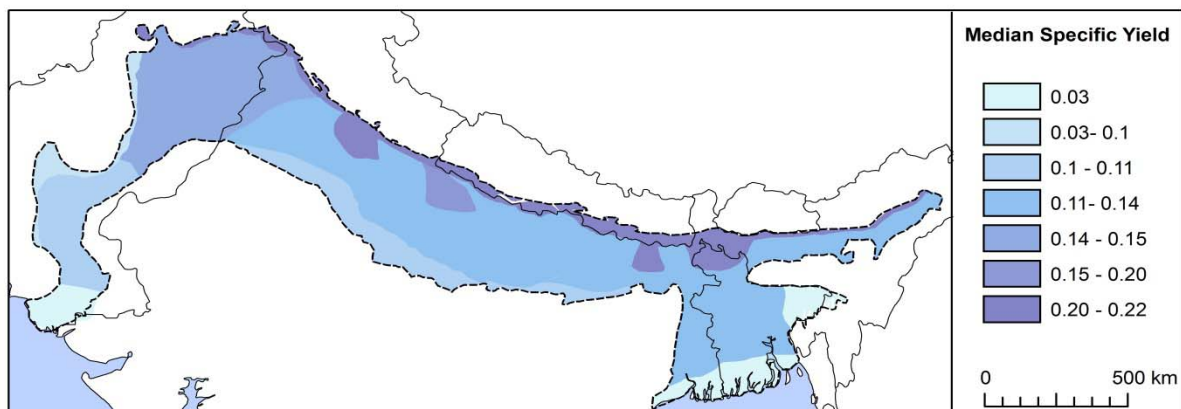

**Supplementary Figure 4** Median specific yield mapped for the basin. See Methods in the main document for how specific yield was calculated.

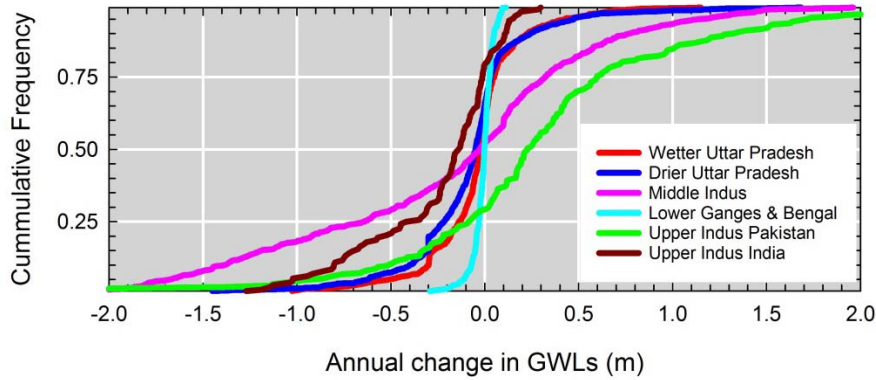

| Region and mapped annual GWL change range per annum | Annual Groundwater level change from the water-table record (WTR) database |                  |                  |                  |                  |                  |       |
|-----------------------------------------------------|----------------------------------------------------------------------------|------------------|------------------|------------------|------------------|------------------|-------|
|                                                     | n                                                                          | 10 <sup>th</sup> | 25 <sup>th</sup> | 50 <sup>th</sup> | 75 <sup>th</sup> | 90 <sup>th</sup> | Mean  |
| <b>Region 2 Middle Indus</b>                        |                                                                            |                  |                  |                  |                  |                  |       |
| <-0.75 m                                            | 0                                                                          |                  |                  |                  |                  |                  |       |
| -0.75 - -0.25 m                                     | 212                                                                        | -1.56            | -1.29            | -0.83            | -0.25            | 0.19             | -0.71 |
| -0.25 - -0.05 m                                     | 172                                                                        | -1.76            | -1.04            | -0.11            | 0.14             | 0.46             | -0.41 |
| -0.05 - +0.05 m                                     | 200                                                                        | -0.30            | -0.01            | 0.24             | 0.80             | 1.31             | 0.42  |
| 0.05 - +0.25 m                                      | 166                                                                        | -0.39            | -0.15            | 0.11             | 0.38             | 0.62             | 0.10  |
| <b>Region 3 Upper Indus Pakistan</b>                |                                                                            |                  |                  |                  |                  |                  |       |
| <-0.75 m                                            | 0                                                                          |                  |                  |                  |                  |                  |       |
| -0.75 - -0.25 m                                     | 0                                                                          |                  |                  |                  |                  |                  |       |
| -0.25 - -0.05 m                                     | 31                                                                         | -0.80            | -0.38            | 0.05             | 0.96             | 1.52             | 0.22  |
| -0.05 - +0.05 m                                     | 170                                                                        | -0.68            | -0.05            | 0.38             | 0.92             | 1.2              | 0.34  |
| 0.05 - +0.25 m                                      | 0                                                                          |                  |                  |                  |                  |                  |       |
| <b>Region 4 Upper Indus India</b>                   |                                                                            |                  |                  |                  |                  |                  |       |
| <-0.75 m                                            | 17                                                                         | -1.03            | -0.92            | -0.80            | -0.67            | -0.24            | -0.73 |
| -0.75 - -0.25 m                                     | 16                                                                         | -1.17            | -0.73            | -0.45            | -0.22            | -0.10            | -0.53 |
| -0.25 - -0.05 m                                     | 59                                                                         | -0.39            | -0.23            | -0.12            | -0.02            | 0.10             | -0.15 |
| -0.05 - +0.05 m                                     | 37                                                                         | -0.30            | -0.14            | -0.01            | 0.10             | 0.14             | -0.10 |
| 0.05 - +0.25 m                                      | 0                                                                          |                  |                  |                  |                  |                  |       |
| <b>Region 5 Drier Uttar Pradesh</b>                 |                                                                            |                  |                  |                  |                  |                  |       |
| <-0.75 m                                            | 0                                                                          |                  |                  |                  |                  |                  |       |
| -0.75 - -0.25 m                                     | 25                                                                         | -0.31            | -0.27            | -0.07            | 0.05             | 0.38             | -0.08 |
| -0.25 - -0.05 m                                     | 584                                                                        | -0.45            | -0.27            | -0.06            | 0.02             | 0.41             | -0.12 |
| -0.05 - +0.05 m                                     | 527                                                                        | -0.34            | -0.17            | -0.04            | 0.03             | 0.51             | -0.01 |
| 0.05 - +0.25 m                                      | 0                                                                          |                  |                  |                  |                  |                  |       |
| <b>Region 6 Wetter Uttar Pradesh</b>                |                                                                            |                  |                  |                  |                  |                  |       |
| <-0.75 m                                            | 0                                                                          |                  |                  |                  |                  |                  |       |
| -0.75 - -0.25 m                                     | 10                                                                         |                  |                  |                  |                  |                  |       |
| -0.25 - -0.05 m                                     | 24                                                                         | -0.91            | -0.39            | -0.05            | 0.12             | 0.50             | -0.14 |
| -0.05 - +0.05 m                                     | 284                                                                        | -0.30            | -0.13            | -0.03            | 0.04             | 0.22             | -0.03 |
| 0.05 - +0.25 m                                      | 0                                                                          |                  |                  |                  |                  |                  |       |
| <b>Region 7 Lower Ganges &amp; Bengal</b>           |                                                                            |                  |                  |                  |                  |                  |       |
| <-0.75 m                                            | 1                                                                          |                  |                  |                  |                  |                  |       |
| -0.75 - -0.25 m                                     | 3                                                                          |                  |                  |                  |                  |                  |       |
| -0.25 - -0.05 m                                     | 64                                                                         | -0.13            | -0.05            | -0.03            | -0.01            | 0.02             | -0.05 |
| -0.05 - +0.05 m                                     | 477                                                                        | -0.07            | -0.03            | 0.00             | 0.03             | 0.05             | -0.01 |
| 0.05 - +0.25 m                                      | 8                                                                          |                  |                  |                  |                  |                  |       |

**Supplementary Figure 5** Cumulative frequency curves for annual changes in groundwater-levels from the WTR dataset divided by the region. The table shows the breakdown of the available WTR data within each mapped range of groundwater-levels in each region. The regions are shown in Figure 2 in the main document.

**Supplementary Table 1** Annual groundwater loss for countries and administrative regions in the IGB aquifer estimated from *in situ* water table measurements and specific yield. Results are shown for two different methods: on the left are from directly using estimates of annual groundwater level change from the map shown in Figure 3; results on the right are calculated by re-attributing the mapped ranges in Figure 3 with the median annual water-level change calculated from the available WTR data.

|                    | Annual groundwater loss (km <sup>3</sup> )<br>using annual water-table trend<br>from map |              |               | Annual groundwater loss (km <sup>3</sup> )<br>using median annual water-table<br>trend from the WTR data |              |              |
|--------------------|------------------------------------------------------------------------------------------|--------------|---------------|----------------------------------------------------------------------------------------------------------|--------------|--------------|
|                    | low Sy                                                                                   | Median Sy    | High Sy       | low Sy                                                                                                   | Median Sy    | High Sy      |
| <b>Bangladesh</b>  | <b>-0.13</b>                                                                             | <b>-0.47</b> | <b>-0.67</b>  | <b>-0.08</b>                                                                                             | <b>-0.26</b> | <b>-0.3</b>  |
| <b>India</b>       |                                                                                          |              |               |                                                                                                          |              |              |
| Assam              | -0.01                                                                                    | -0.02        | -0.03         | 0.01                                                                                                     | 0.02         | 0.03         |
| Bihar              | -0.10                                                                                    | -0.29        | -0.43         | -0.06                                                                                                    | -0.18        | -0.26        |
| Haryana            | -0.97                                                                                    | -1.55        | -2.18         | -0.90                                                                                                    | -1.44        | -2.02        |
| Punjab             | -1.65                                                                                    | -2.59        | -3.52         | -1.69                                                                                                    | -2.62        | -3.58        |
| Uttar Pradesh      | -1.60                                                                                    | -2.46        | -3.57         | -0.75                                                                                                    | -1.17        | -1.74        |
| Others             | -0.30                                                                                    | -0.63        | -1.01         | -0.21                                                                                                    | -0.43        | -0.69        |
| <b>Total</b>       | <b>-4.62</b>                                                                             | <b>-7.54</b> | <b>-10.75</b> | <b>-3.60</b>                                                                                             | <b>-5.82</b> | <b>-8.26</b> |
| <b>Nepal</b>       | <b>0.00</b>                                                                              | <b>-0.01</b> | <b>-0.01</b>  | <b>0.00</b>                                                                                              | <b>0.00</b>  | <b>0.00</b>  |
| <b>Pakistan</b>    |                                                                                          |              |               |                                                                                                          |              |              |
| Punjab             | -0.74                                                                                    | -1.38        | -1.74         | -1.12                                                                                                    | -2.09        | -2.65        |
| Sind               | 0.18                                                                                     | 0.35         | 0.50          | 0.15                                                                                                     | 0.31         | 0.44         |
| others             | -0.10                                                                                    | -0.20        | -0.30         | -0.06                                                                                                    | -0.13        | -0.19        |
| <b>Total</b>       | <b>-0.66</b>                                                                             | <b>-1.23</b> | <b>-1.54</b>  | <b>-1.03</b>                                                                                             | <b>-1.91</b> | <b>-2.39</b> |
| <b>Grand Total</b> | <b>-5.4</b>                                                                              | <b>-9.2</b>  | <b>-13.0</b>  | <b>-4.7</b>                                                                                              | <b>-8.0</b>  | <b>-11.0</b> |

**Supplementary Table 2** Comparison of annual groundwater mass loss from the *in situ* measurements provided in this study with estimates from GRACE for Northwest India. We have used the mapped annual rates of mass loss in cm/yr for each of the studies, applied spatial scaling factors where published, and integrated over the area of the states of Punjab, Haryana and Rajasthan. Uncertainties in parenthesis are the potential errors quoted in each GRACE study, and the uncertainty in specific yield estimations for our IGB *in situ* measurements.

|                | Average annual groundwater loss km <sup>3</sup> |                            |                            |                          |                           |
|----------------|-------------------------------------------------|----------------------------|----------------------------|--------------------------|---------------------------|
|                | IGB <i>in situ</i> measurements                 | Rodell <sup>a</sup> et al. | Tiwari <sup>b</sup> et al. | Chen <sup>c</sup> et al. | Panda <sup>d</sup> et al. |
| Period covered | 2000-2012                                       | 2002 - 2008                | 2002-2008                  | 2003-2012                | 2003-2014                 |
| Punjab         | 2.6 (1.7 - 3.6)                                 | 1.1 (0.8-1.3)              | 1.5 (1.3 - 1.8)            | 2.0 (1.3 - 2.7)          | 1.1 (0.9 - 1.5)           |
| Haryana        | 1.4 (0.9 – 2.0)                                 | 1.3 (1.0-1.6)              | 1.4 (1.1 - 1.7)            | 1.8 (1.2 - 2.5)          | 0.96 (0.8 - 1.4)          |
| Rajasthan      | NA                                              | 15.5 (11.5 - 19.4)         | 10.3 (8.6 - 12.0)          | 13.7 (8.9 - 18.5)        | 7.2 (6.0 – 10.3)          |

<sup>a</sup>Rodell, M., Velicogna, I. & Famiglietti, J. S. Satellite-based estimates of groundwater depletion in India, *Nature* **460**, 999-1002 (2009).

<sup>b</sup>Tiwari VM, Wahr J and Swenson S. Dwindling groundwater resources in northern India, from satellite gravity observations, *Geophysical research Letters*, 36; L18401, doi: 10.1029/2009GL039401. (2009)

<sup>c</sup>Chen, J., Li, ., Zhang, Z. & Ni, S. Long-term variations in Northwest India from Satellite gravity measurements, *Global and Planetary Change* **116**, 130-138 (2014).

<sup>d</sup>Panda D. K. & Wahr, J. Spatiotemporal evolution of water storage changes in India from the updated GRACE-derived gravity records. *Water Resources Research* **52**, doi:10.1002/2015WR017797 (2016)

**Supplementary Table 3 Main groundwater abstraction data sources**

|                                                                                                                                                                                                                                                                                                                                                                                                                                                                                                                                                                                                                                                                                                                                                                                                                                                                                                                                                                                             |
|---------------------------------------------------------------------------------------------------------------------------------------------------------------------------------------------------------------------------------------------------------------------------------------------------------------------------------------------------------------------------------------------------------------------------------------------------------------------------------------------------------------------------------------------------------------------------------------------------------------------------------------------------------------------------------------------------------------------------------------------------------------------------------------------------------------------------------------------------------------------------------------------------------------------------------------------------------------------------------------------|
| <p><b>Pakistan</b></p> <p>Cheema, M. J. M., Immerzeel, W. W. &amp; Bastiaanssen, W. G. M. Spatial quantification of groundwater abstraction in the irrigated Indus Basin. <i>Ground Water</i> <b>52</b>, 25-36 (2014).</p> <p>Basharat, M. &amp; Rizvi, S. A. 2011. Groundwater extraction and waste water disposal regulation. Is Lahore Aquifer at stake with as usual approach? In: Proceedings of World Water Day 2011 <i>Water for Cities-Urban Challenges</i>, (Pakistan Engineering Congress, Lahore, Pakistan 135-152 2011)</p> <p>Ahmad, S., Mulk, S. &amp; Amir, M. <i>Groundwater Management in Pakistan</i>. First South Asia Water Forum Kathmandu Nepal (Pakistan Water Partnership. Pakistan 2002).</p> <p>Halcrow-ACE. <i>Exploitation and regulation of fresh groundwater. Main Report</i>. ACE-Halcrow JV Consultants, Gulberg III, Lahore, Pakistan (2003).</p> <p>FAO. <i>AQUASTAT</i>. Food and agriculture organization of the United Nations (Accessed Feb 2015)</p> |
| <p><b>India</b></p> <p>Central Groundwater Board District Groundwater Information 2013 (accessed online July 2014)</p>                                                                                                                                                                                                                                                                                                                                                                                                                                                                                                                                                                                                                                                                                                                                                                                                                                                                      |
| <p><b>Bangladesh</b></p> <p>Michael, H. A. &amp; Voss, C. I. Controls on groundwater flow in the Bengal Basin of India and Bangladesh: regional modelling analysis. <i>Hydrogeology Journal</i> <b>17</b>, 1561-1577 (2009).</p> <p>Shamsudduha, M., Taylor, R. G. &amp; Chandler, R. E. A generalized regression model of arsenic variations in the shallow groundwater of Bangladesh. <i>Water Resources Research</i> <b>51</b>, 685–703 (2015).</p> <p>DWASA. <i>Annual Report of 2011-12</i>. (Dhaka Water Supply &amp; Sewerage Authority, Dhaka, 2012)</p>                                                                                                                                                                                                                                                                                                                                                                                                                            |
| <p><b>Nepal</b></p> <p>GeoConsult. <i>Study of tube well inventory of 22 Terai and Inner Terai Districts, Nepal</i>. (Groundwater Resources Development Board, Ministry of Irrigation, Government of Nepal, Kathmandu, 2002).</p> <p>Seibert, S. et al. Groundwater use for irrigation – a global inventory. <i>Hydrological Earth System Science</i> <b>14</b>, 1863-1880 (2010).</p>                                                                                                                                                                                                                                                                                                                                                                                                                                                                                                                                                                                                      |
| <p><b>Rate of increase of abstraction</b></p> <p>Shah T. Climate change and groundwater: India's opportunities for mitigation and adaptation, <i>Environmental Research Letters</i> <b>4</b>, 035005 (2009)</p> <p>Shah, T., Burke, J. M. &amp; Villholth, K. et al 2007 Groundwater: a global assessment of scale and significance. In: <i>Water for Food, Water for Life: A Comprehensive Assessment of Water Management in Agriculture</i> Ed D Molden (London: Earthscan) (Colombo: IWMI)</p> <p>Quereshi, A.S., Gill, M. A. &amp; Sarwar, A. Sustainable groundwater management in Pakistan: challenges and opportunities. <i>Irrigation and drainage</i> <b>59</b>, 107-116 (2008).CGWB. 2014. Ground Water Year Book 2012-13 - India. CGWB. 100 pp</p> <p>FAO. 2012. Irrigation in Southern and Eastern Asia in Figures, AQUASTAT Survey 2011, FAO Water Reports 37, Rome (2012)</p>                                                                                                 |
| <p><b>Total Number of boreholes</b></p>                                                                                                                                                                                                                                                                                                                                                                                                                                                                                                                                                                                                                                                                                                                                                                                                                                                                                                                                                     |

Khan, M. M. H., Aklimunnessa, K., Kabir, M., Mori, M. Determinants of drinking arsenic-contaminated tubewell water in Bangladesh. *Health Policy and Planning* **2**, 335-343 (2007)

Michael, H. A. & Voss, C. I. Controls on groundwater flow in the Bengal Basin of India and Bangladesh: regional modelling analysis. *Hydrogeology Journal* **17**, 1561-1577 (2009).

Government of India . All India Report on Input Survey 2006-07. (Agriculture Census Division, Department of Agriculture & Cooperation, Ministry of Agriculture, Government of India, New Delhi, 2012)

Government of India (. State of Indian Agriculture 2012-13. Ministry of Agriculture, Government of India, New Delhi, 2013)

Rawat, S. & Mukherji, A. The poor state of irrigation statistics in India: the case of wells and tube wells. Water Policy Highlight (MWI-TATA Water Policy Programme, Gujarat, India, 2012).

Yu, W., Yang, Y. C., Savitsky, A., Alford, D., Brown, C., Wescoat, J., Debowicz, D. & Robinson, S. The Indus Basin of Pakistan, the impacts of climate risks on water and agriculture. (The World Bank, Washington DC, 2013).

GeoConsult. *Study of tube well inventory of 22 Terai and Inner Terai Districts, Nepal*. (Groundwater Resources Development Board, Ministry of Irrigation, Government of Nepal, Kathmandu, 2002).

#### **Total global groundwater abstraction**

Margat, J., & J. van der Gun. *Groundwater around the World*. (CRC Press/Balkema, London, 2013).

Wada, Y., Beek, L. P. H., van Kempen, C. M., Reckman, J. W. T. M., Vasak, S. & Bierkens, M. F. P. 2010. Global depletion of groundwater resources, *Geophysical Research Letters* **37**,L20402



#### Supplementary Table 4 Main data sources for water-table records

##### India

Central Ground Water Board (CGWB) groundwater-level quarterly monitoring data from Indian national groundwater level archive sourced from CGWB, National Data Centre, NH-IV, Faridabad (accessed Feb2014)

Six monthly, groundwater level data courtesy of individual state government (Groundwater Directorate or Directorate/Water Resources) in Assam, Bihar, Punjab, Uttar Pradesh, West Bengal. (gathered from regional offices during 2014)

Monthly groundwater-level monitoring data for Bist-Doab, Punjab, courtesy of Punjab State government 1975-2012.

UNDP Groundwater studies in the Ghaggar River Basin, in Punjab, Haryana and Rajasthan, , Ref DP/UN/IND-74-009/2 (1974)

Goyal, S. K., Chaudhary, B. S., Singh, O., Sethi, G. K., Thakur, P. K. Variability Analysis of Groundwater Levels – A GIS-Based Case Study. *J. Indian Soc. Remote Sens.* **38**: 355-364 (2010)

##### Pakistan

Pakistan Water and Power Development Authority (WAPDA) groundwater monitoring data records for Pakistan across both the Upper and Lower Indus Basin Irrigation System: six-monthly data for Sindh [some monitoring points of which were originally for the Salinity Control and Reclamation Project (SCARP) Monitoring Organisation (SMO), and six-monthly for Punjab (collated by Department for Land and Reclamation Punjab of the Government department of Irrigation and Power, of the Punjab Irrigation and Drainage Authority Lahore, and deposited with WAPDA).

Some of these data are presented and/or summarised in the following reports and publications:

Basharat, M., Hassan, D., & Bajkani, A. A. & Sultan, S. J. Surface water and groundwater Nexus: groundwater management options for Indus Basin Irrigation System, International Waterlogging and Salinity Research Institute (IWASRI), Lahore, Pakistan Water and Power Development Authority, Publication no. 299, (2014).

Iqbal, R. M. & Hannan, A. Groundwater Monitoring Report 2012, Directorate of Land and Reclamation Punjab, Irrigation and Power Department, Punjab Irrigation and Drainage Authority, Lahore (2012).

Basharat, M. & Tariq, A. U. R. Long-term groundwater quality and saline intrusion assessment in an irrigated environment: a case study of the aquifer under the LBDC irrigation system, *J of Irrigation and Drainage* **62**, 510-523 (2013)

##### Bangladesh

Groundwater monitoring data of the Bangladesh Water Development Board (BWDB) – 1985-2007.

Data have been published in:

Shamsudduha, M., Chandler, R. E., Taylor, R. G., & Ahmed, K. M. Recent trends in groundwater levels in a highly seasonal hydrological system: the Ganges-Brahmaputra-Meghna Delta. *Hydrological Earth System Science* **13**, 2373–2385, (2009) *period covered 2003 - 2007*



Shamsudduha, M., Taylor, R. G., Ahmed, K. M. & Zahid, A. The impact of intensive groundwater abstraction on recharge to a shallow regional aquifer system: evidence from Bangladesh, *Hydrogeology Journal* **19**, 901-916 (2011).

**Nepal**

Groundwater Resource Development Board (GWRDB) District Monthly groundwater-level monitoring data 2000-2010.

GWRDB. Hydrogeological and groundwater potential maps for the Terai Pkains (1:125,000) Groundwater Resources development Board. Ministry of Irrigation, Government of Nepal Kathmandu (1993)

**Supplementary Table 5      Main sources for spatial maps on depth to water-table**

**Pakistan**

Iqbal, R. M. & Hannan, A. 2012. Groundwater monitoring in Punjab: Analysis of trend in groundwater level and an overview of groundwater quality status (2012) *period covered 2001 – 2011*

Basharat, M., Hassan, D., Bajkani, A. A. & Sultan, S.J. *Surface water and groundwater Nexus: groundwater management options for Indus Basin Irrigation System*. International Waterlogging and Salinity Research Institute (IWASRI), Lahore, Pakistan Water and Power Development Authority, Publication no. 299. (2014) *period covered 2000 – 2011*

**India**

CGWB. *Groundwater Year Book – India 2011-12*. Central Groundwater Board, Ministry of Water resources, Government of India, Faridabad (2012). *Period covered 2000 - 2011*

CGWB. *Dynamic Groundwater Resources of India*. Central Groundwater Board, Ministry of Water resources, Government of India, Faridabad, (2011) *Period covered 2000 – 2010*

UNDP. Groundwater studies in the Ghaggar River Basin , in Punjab, Haryana and Rajasthan, Ref DP/UN/IND-74-009/2, UNDP (1973)

**Bangladesh**

Shamsudduha, M., Chandler, R. E., Taylor, R. G., & Ahmed, K. M. Recent trends in groundwater levels in a highly seasonal hydrological system: the Ganges-Brahmaputra-Meghna Delta. *Hydrological Earth System Science* **13**, 2373–2385, (2009) *period covered 2003 - 2007*

Shamsudduha, M., Taylor, R. G., & Longuevergne, L., Monitoring groundwater storage changes in the Bengal Basin: validation of GRACE measurements. *Water Resources Research* **48**, W02508 (2012). *Period covered 2003 - 2007*

**Nepal**

Geoconsult. Study of tube well inventory of 22 Terai and Inner Terai Districts, Nepal. Groundwater Resources Development Board, Ministry of Irrigation, Government of Nepal, Kathmandu (2012). *Period covered 2011*

**Supplementary Table 6 Main sources for water quality maps**

|                                                                                                                                                                                                                                                                                                                                                                                                                                                                                                                                                                                                                                                                                                                                                                                                                                                                                                                                                                                                                                                                                                                                                                           |
|---------------------------------------------------------------------------------------------------------------------------------------------------------------------------------------------------------------------------------------------------------------------------------------------------------------------------------------------------------------------------------------------------------------------------------------------------------------------------------------------------------------------------------------------------------------------------------------------------------------------------------------------------------------------------------------------------------------------------------------------------------------------------------------------------------------------------------------------------------------------------------------------------------------------------------------------------------------------------------------------------------------------------------------------------------------------------------------------------------------------------------------------------------------------------|
| <p><b>Pakistan</b></p> <p>IWASRI <i>Drainage Atlas of Pakistan</i>. (International Water Logging and Salinity Research Institute, Lahore, 2005).</p> <p>WAPDA. <i>Hydrogeological map of Pakistan (scale 1:250,000)</i>. (Directorate of Hydrogeology, WAPDA, Lahore, 2001).</p>                                                                                                                                                                                                                                                                                                                                                                                                                                                                                                                                                                                                                                                                                                                                                                                                                                                                                          |
| <p><b>India</b></p> <p>CGWB. <i>Groundwater quality in shallow aquifers of India</i>. (Central Groundwater Board, Ministry of Water Resources, New Delhi, 2010)</p> <p>Central Groundwater Board District Groundwater Information 2013 (accessed online July 2014)</p>                                                                                                                                                                                                                                                                                                                                                                                                                                                                                                                                                                                                                                                                                                                                                                                                                                                                                                    |
| <p><b>Bangladesh</b></p> <p>Ravenscroft, P., Ahmed, K. M. &amp; Samad, M. A., <i>Groundwater: Quantity and Quality Issues Affecting Water Supply</i>. Sector Development Plan (FY 2011-25), Working document number 9, Water Supply and Sanitation Sector in Bangladesh. Policy Support Unit, Local Government Division, Government of Bangladesh. (2009)</p> <p>DPHE/ BGS. Arsenic contamination of groundwater in Bangladesh. Kinniburgh DG &amp; Smedley PL (eds). British Geological Survey Technical Report WC-00-19 (British Geological Survey, Keyworth, 2001)</p>                                                                                                                                                                                                                                                                                                                                                                                                                                                                                                                                                                                                 |
| <p><b>Nepal</b></p> <p>Geoconsult. Study of tube well inventory of 22 Terai and Inner Terai Districts, Nepal (2012)</p> <p>GWRDB. Hydrogeological and groundwater potential maps for the Terai Pkains (1:125,000) Groundwater Resources development Board. Ministry of Irrigation, Government of Nepal Kathmandu (1993)</p>                                                                                                                                                                                                                                                                                                                                                                                                                                                                                                                                                                                                                                                                                                                                                                                                                                               |
| <p><b>Arsenic</b></p> <p>Amini, M. et al. Statistical Modelling of Global Geogenic Arsenic contamination in groundwater, <i>Environmental Science and Technology</i>, 42; 3669–3675 (2008)</p> <p>CGWB Groundwater quality in shallow aquifers of India. Central Groundwater Board, Ministry of Water Resources, New Delhi (2010).</p> <p>CGWB/NIH. Groundwater quality Ganga Basin dataset: Iron, Arsenic, Fluoride. Nitrate point monitoring data – Internal report from National Institute of Hydrology, Roorkee</p> <p>DPHE/ BGS. Arsenic contamination of groundwater in Bangladesh. Kinniburgh DG &amp; Smedley PL (eds). British Geological Survey Technical Report WC-00-19 (British Geological Survey, Keyworth, 2001)</p> <p>Geoconsult. Study of tube well inventory of 22 Terai and Inner Terai Districts, Nepal (2012)</p> <p>GWRDB. Hydrogeological and groundwater potential maps for the Terai Pkains (1:125,000) Groundwater Resources development Board. Ministry of Irrigation, Government of Nepal Kathmandu (1993)</p> <p>IWASRI <i>Drainage Atlas of Pakistan</i>. (International Water Logging and Salinity Research Institute, Lahore, 2005).</p> |

Mahanta et al. Mineralogy, Grain size, and sediment composition as factors controlling release and mobilisation of Arsenic in an aquifer regime of the Brahmaputra Floodplains, northeastern India, Presented at JNU Indo-Australia workshop (2012)

Nigam, J. Uttar Pradesh: Arsenic in Ground Water: Affected Blocks. State Water Resources Agency, Uttar Pradesh/UNICEF (2008)

Ravenscroft, P. Predicting the global extent of As pollution of groundwater and its potential impact on human health, UNICEF Report, 71 pp, New York. (2007)

SOES. Groundwater arsenic contamination in West Bengal – India (20 year study). School of Environment Studies, Jadavpur University, Kolkata (2006).

UNICEF. Report on Arsenic in groundwater in Uttar Pradesh: Sanitation ,Water Supply and Hygiene Project 2004-2008. (UNICEF, New York, 2008)

WAPDA. *Hydrogeological map of Pakistan (scale 1:250,000)*. (Directorate of Hydrogeology, WAPDA, Lahore, 2001).

**Supplementary Table 7 Main sources for information on aquifer geology, sedimentology, porosity and specific yield**

Acharyya, S. K. Arsenic levels in groundwater from Quaternary Alluvium in the Ganga Plain and Bengal Basin, Indian subcontinent: insights into influence of stratigraphy. *Gondwana Research*, 8; 1; 55-56 (2005)

Ahmed, S. Groundwater Resources of Pakistan. 560 pp (1995)

Alam, M. et al. An overview of the sedimentary geology of the Bengal Basin in relation to the regional tectonic framework and basin-fill history, *Sedimentary Geology*, 155; 179-208 (2003)

Bennett, G. D., Rehman, A. U., Sheikh, J. A., Ali, S. Analysis of pumping tests in the Punjab region of west Pakistan, Geological Survey Water-Supply Paper 1608-G, prepared in cooperation with the W Pakistan Water & Power Dec Authority under US AID (1969)

CGWB Groundwater quality in shallow aquifers of India. Central Groundwater Board, Ministry of Water Resources, Delhi (2010)

Chilton, P. J. Pakistan Scavenger wells pilot project: an introductory note for BGS staff, BGS Technical report WD/OS/86/16, pp21 (1986)

Clift, P. D. & Giosan, L. Sediment fluxes and buffering the post-glacial Indus Basin, *Basin Research*, 25; 1-18. (2013)

DPHE/ BGS. Arsenic contamination of groundwater in Bangladesh. Kinniburgh DG & Smedley PL (eds). British Geological Survey Technical Report WC-00-19, BGS, Keyworth (2001)

France-Lanord, C. Evolution of the Himalaya since Miocene time: isotopic and sedimentological evidence from the Bengal Fan, *Geological Society London Special Publications*, 74; 589-602, doi: 10.1144/GSL.SP.1993.074.01.40 (1993)

Goodbred, S. L. Response of the Ganges dispersal system to climate change: a source to sink view since the last interstade, *Sedimentary Geology*, 162; 1-2, 83-104 (2003)

Goodbred, A. L. & Kuehl, S. A.. The significance of large sediment supply, active tectonism and eustasy on margin sequence development: late Quaternary stratigraphy and evolution of the Ganges-Brahmaputra delta, *Sedimentary Geology*, 133; 227-248 (2000)

Heroy, D. C. Kuehl, S. A. & Goodbred, S. L. Mineralogy of the Ganges and Brahmaputra Rivers: implications for river switching and Late Quaternary climate change. *Sedimentary Geology*, 155; 343-359 (2003)

Johnson, Y. J., Alam, A. M. N. Sedimentation and tectonics of the Sylhet Trough, Bangladesh. *Geological Society of America Bulletin*, 103; 1513–1527. (1991)

- Khan, M. R., Voss, C. I., Yu, W. & Michael, H. A. Water resources management in the Ganges Basin: A comparison of Three Strategies for Conjunctive use of groundwater and surface water, *Water Resources Management*, doi:10.1007/s11269-014-0537-y (2014)
- Kumar, M. R., Mishra, D. C. & Singh, B. Lithosphere, crust and basement ridges across the Ganga and Indus basins and seismicity along the Himalayan front, India and Western Fold Belt, Pakistan, *Journal of Asian Earth Sciences*, 75; 5, 126-140. (2014)
- Sir Mott MacDonald and Partners Ltd. LBOD Stage 1 Project, Additional Preparation. Final report. (1985)
- Saha, D., Sahu, S. & Chandra, P. C. As-safe alternate aquifers and their hydraulic characteristics in contaminated areas of Middle Ganga Plain, Eastern India. *Environ Monit Assess*, 175; 331-348. (2011)
- Sahu, S. & Saha, D. Geomorphic, stratigraphic and sedimentological evidences of tectonic activity in the Sone-Ganga alluvial tract in the Middle Ganga Plain, India. *Journal of Earth Systems Science*, **123**, 1335-1347. (2014)
- Samadder, R. K., Kumar, S. & Gupta, R. P. Paleochannels and their potential for artificial recharge in the western Ganga plains. *J Hydrology*, **400**, 154-164. (2011)
- Shamsudduha, M., Taylor, R. G., Ahmed, K. M., & Zahid, A. The impact of intensive abstraction on recharge to a shallow regional aquifer system: evidence from Bangladesh, *Hydrogeology Journal*, **19**; 901-916. (2011)
- Shroder, J. F. Himalaya to the Sea. Geology, Geomorphology and the Quaternary. Routledge Press (1993)
- Shukla, U. K., Singh, I. B., Sharma, M. & Shamra, S. 2. A model of alluvial megafan sedimentation: Ganga megafan, *Sedimentary Geology*, **144**; 243-262 (2001)
- Singh I. B. Geological evolution of Ganga Plain - an overview, *Journal of The Palaeontological Society of India* , 41; 99-137. (1996)
- Singh I. B. et al. Upland Interfluvial (Doab) Deposition: Alternative model to Muddy Overbank Deposits, *Facies*, 40; 197-211 (1999)
- Singh, I. B. Late Quaternary history of the Ganga plain. *J Geol Soc India*, 64. pp 431-454 (2004)
- Singh, I. B. The Ganga River. In Gupta A. (ed) Large Rivers: geomorphology and management, Wiley, England, pp 689. (2007)
- Sinha, R., Gibling, M. R., Tandon, S. K., Jain, V. & Dasgupta, A. S. Quaternary stratigraphy and sedimentology of the Kotra Section on the Betwa River, Southern Gangetic Plains, Uttar Pradesh, *J of Geological Society India*, 65; 441-450. (2005)
- Sinha, R. et al. Craton-derived alluvium as a major sediment source in the Himalaya Foreland Basin of India, *GSA Bulletin*, **121**; 11-12; 1596-1610. (2014)

Srivastava, et al. Soils of the Indo-Gangetic Plain: a pedogenic response to landscape stability, climatic variability and anthropogenic activity during the Holocene, *Earth Science Reviews*, doi: 10.1016/j.earscirev.2014.10.010. (2015)

Valdiya, K, S.. Emergence and Evolution of Himalaya: reconstructing history in the light of recent studies, *Progress in Physical Geography*, 26; 3; 60. (2002)



### **Supplementary Text 1. Criteria for reviewing and selecting studies for inclusion**

Over 500 studies were reviewed in total from published studies and grey literature and databases available to the project team within India, Pakistan Bangladesh and Nepal. The approximately 100 studies which provided the highest quality systematic regional data on water quality, abstraction , depth to water-table, sedimentology and aquifer storage form the key benchmark papers and are provided in Table S1-S5. The methods used to systematically review the 500 studies are described below.

The studies were collated from literature reviews, supplemented by specific country knowledge and networks from the international author list. Studies were indexed and stored in an Access database, then georeferenced and output to GIS (Arc 10). The use of the GIS enabled spatial comparison and interrogation of the different types of information relating to each area. Numerical data within the studies relating to storage, recharge processes, water-levels and groundwater chemistry were collated, georeferenced, then output to GIS. Due the large number of data types, sources, and different scales of the data and studies, systematic criteria were applied in reviewing the data to identify a confidence rank to the studies, and data contained. Key inclusion criteria were: (1) that the depth and aquifer unit for the study was well constrained; (2) the date was available for temporal data; (3) there was sufficient methodological description to assess the quality of the data; and (4) appropriate standard methods were used to generate the data. Data which only partially satisfied these criteria were ranked to be of lower confidence. High quality studies were used as the key inputs to develop and parametrise the new basin-wide maps , with lower quality studies being used to provide supplementary information in areas where there were no high quality studies available.
